# Supplementary material
Source: MDPI journal article supplement (https://www.mdpi.com/2227-9040/12/2/23)
Supplement: s1 [file s1]

# Supplementary information for

## Low-cost carbon paste Cu(II)-exchanged zeolite amperometric sensor for hydrogen peroxide detection

Delia Gligor<sup>1</sup>, Sanda Andrada Maicaneanu<sup>2</sup> and Codruta Varodi<sup>3,\*</sup>

<sup>1</sup> Department of Environmental Analysis and Engineering, Babes-Bolyai University, 30 Fantanele St., RO-400294, Cluj-Napoca, Romania 1; delia.gligor@ubbcluj.ro

<sup>2</sup> Madia Department of Chemistry, Biochemistry, Physics and Engineering, Indiana University of Pennsylvania, 975 Oakland Avenue, Indiana, PA 15705, USA; sanda.maicaneanu@iup.edu

<sup>3</sup> National Institute for Research and Development of Isotopic and Molecular Technologies, 67-103 Donat St., RO-400293, Cluj-Napoca, Romania  
Correspondence: codruta.varodi@itim-cj.ro

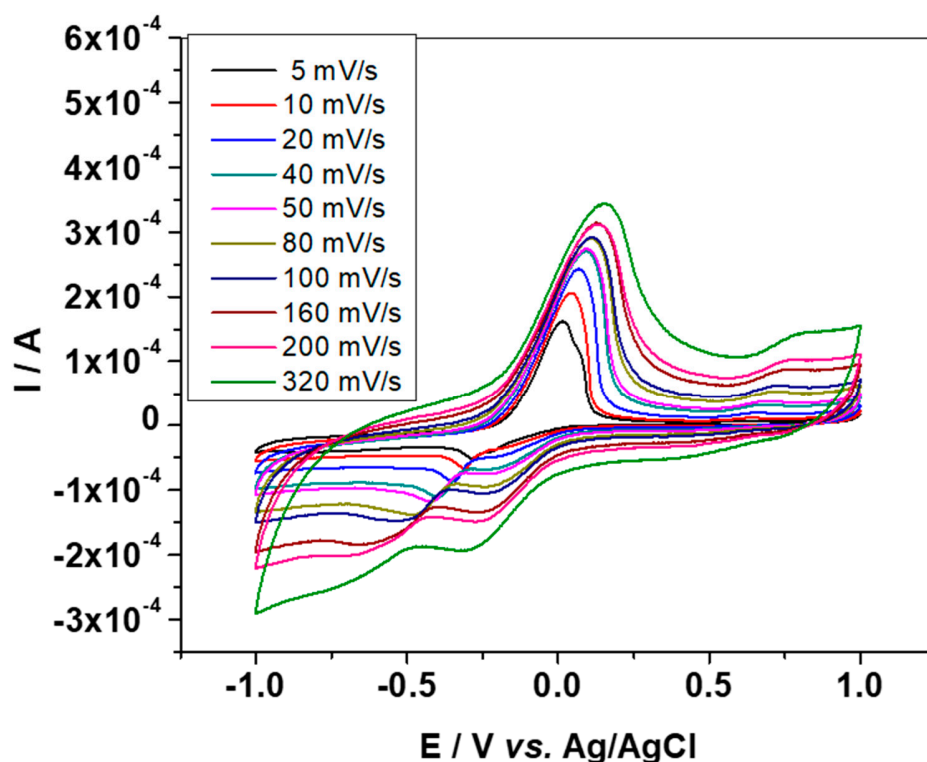

**Figure S1.** Cyclic voltammograms corresponding to obtained Cu-Z-CPEs electrodes, recorded at increased scan rates of the electrode potential (between 5 mV/s and 320 mV/s), in 0.1 M phosphate buffer solution, pH 7.

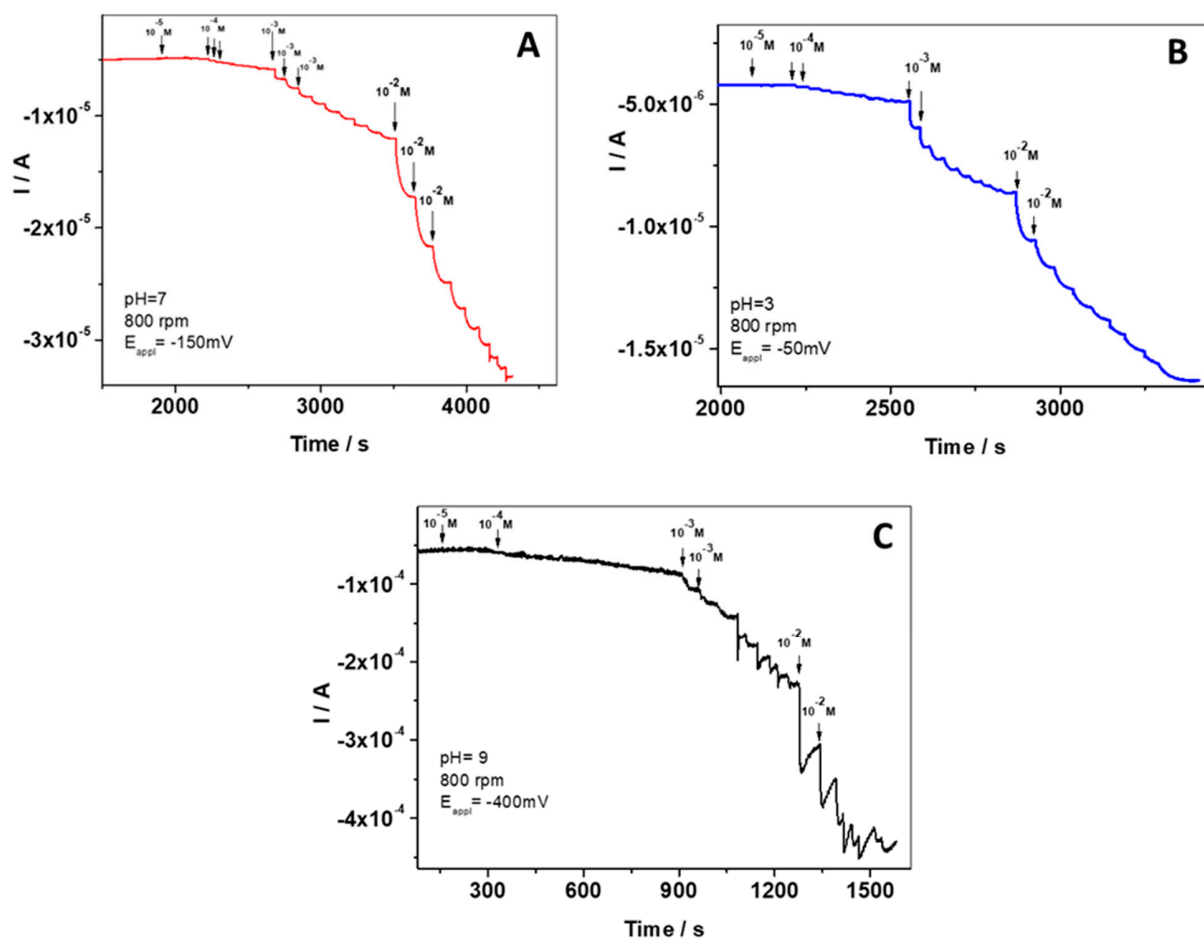

**Figure S2.** The amperometric response of the modified electrodes Cu-Z-CPEs, in 0.1 M phosphate buffer solutions with different pH values pH 7.0 (A), pH 3.0 (B) and pH 9.0 (C), at increased values of  $\text{H}_2\text{O}_2$  concentrations (between  $10^{-5}$  and  $10^{-1}$  M  $\text{H}_2\text{O}_2$ ), rotation speed of 800 rpm and using the values of applied potential determined above: -50 mV vs. Ag/AgCl/KCl sat (pH 3), -150 mV vs. Ag/AgCl/KCl sat (pH 7) and -400 mV vs. Ag/AgCl/KCl sat (pH 9).
